# Supplementary material
Source: Springer Nature journal article supplement (http://www.springermedizin.de/resource/supplementary/12984_2008_153_MOESM2_ESM.pdf/9605414)

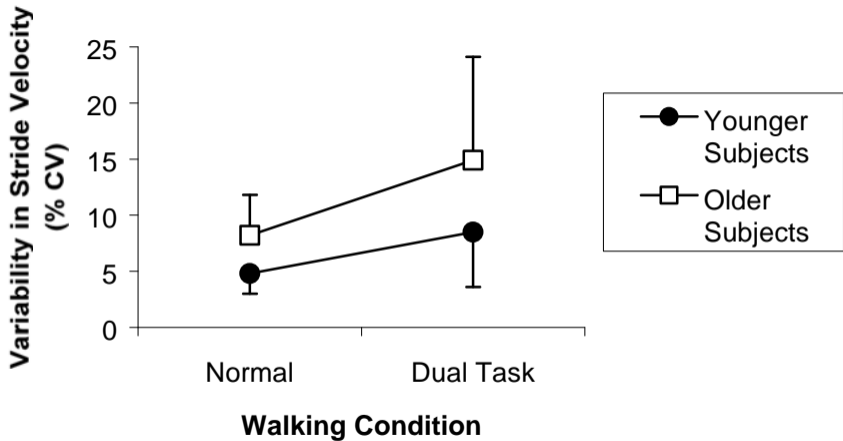

Supplement: MOESM2 [file 9605414]
